# Supplementary material for: Laser patterned, high-power graphene paper resistor with dual temperature coefficient of resistance
Source: Royal Society of Chemistry journal article supplement (doi:10.1039/c8ra10246e), 2019-01-01
Supplement: c8ra10246e1.pdf [file c8ra10246e1.pdf]

## Supplementary Information

### Laser Patterned, High-Power Graphene Paper Resistor with Dual Temperature Coefficient of Resistance

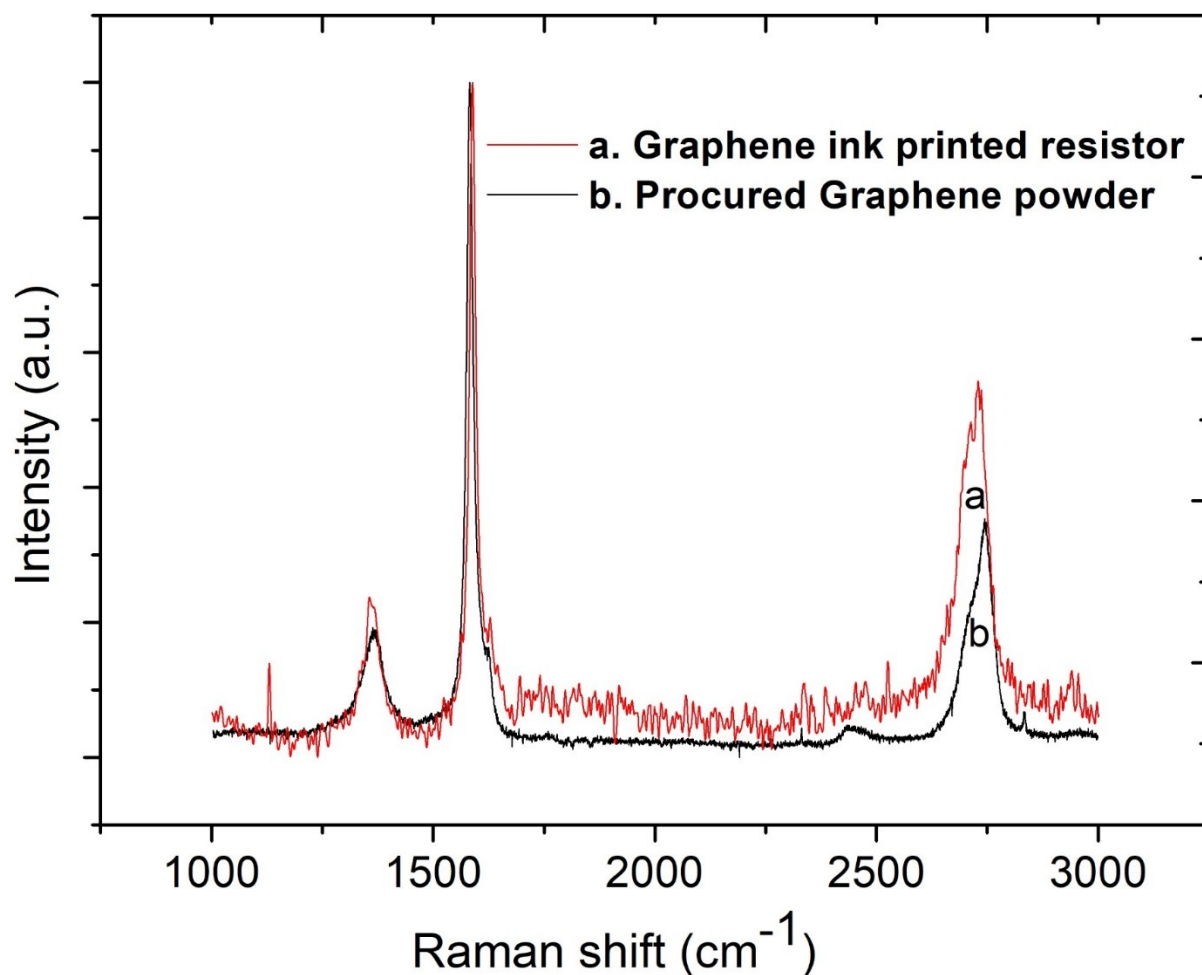

Figure S1: Raman spectra of Procured graphene powder and graphene ink printed resistor

Table S1: Change in resistance corresponding to the annealing temperature and time

| Annealing Time (min.) | At 373K                         | At 423 K |
|-----------------------|---------------------------------|----------|
|                       | Change in Resistance per minute |          |
| 10                    | 331                             | 1761     |
| 30                    | 88                              | 47       |
| 60                    | 13                              | 44       |
| 120                   | 55                              | 4        |

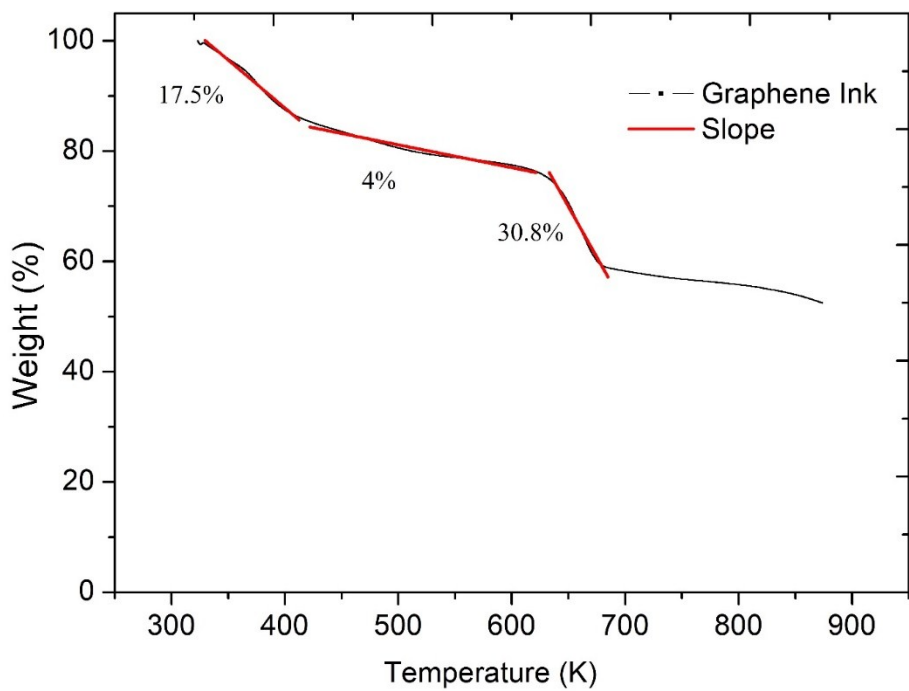

Figure S2: TGA of the graphene ink

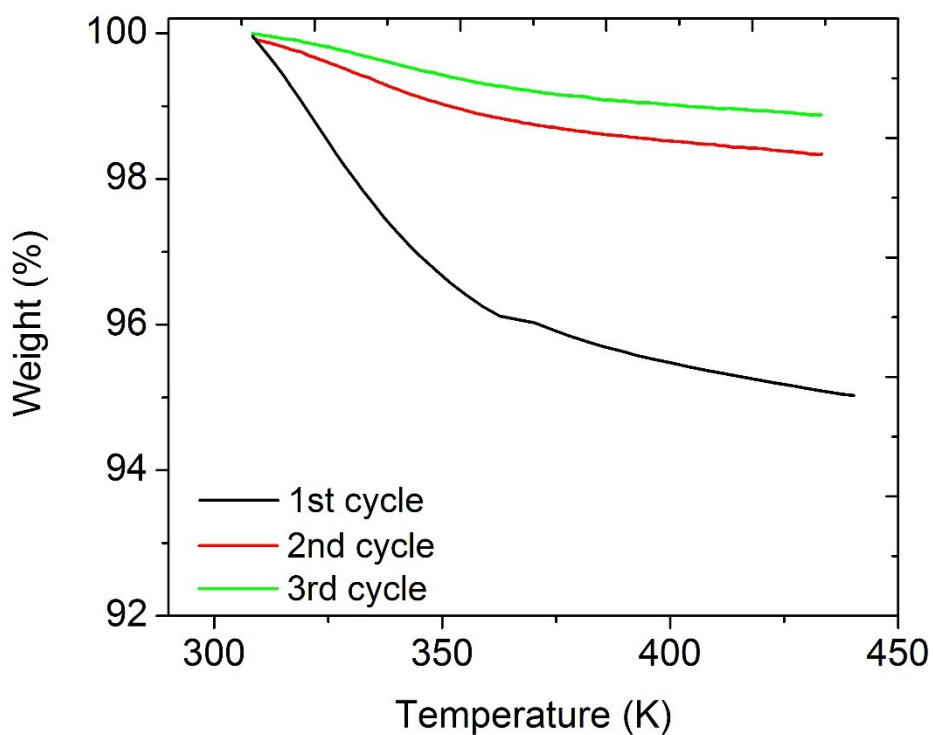

Figure S3: TGA of the graphene ink bar coated on paper

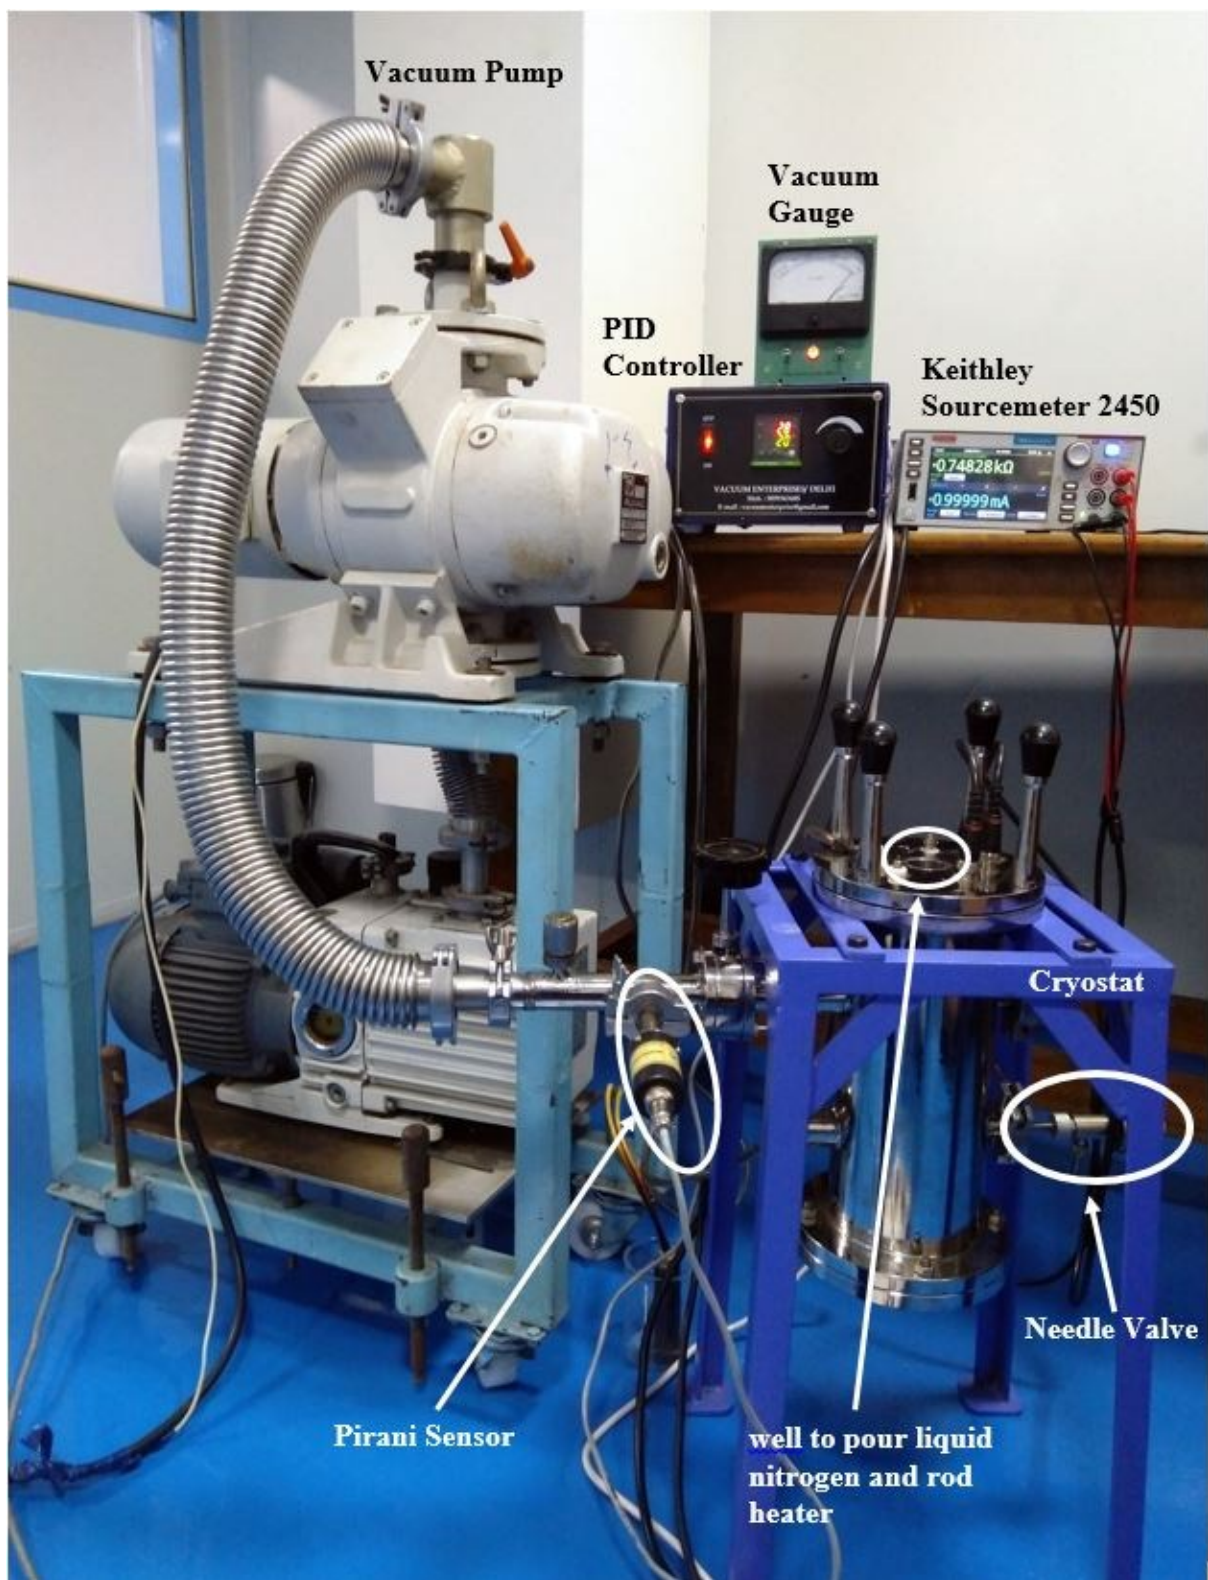

Figure S4: Cryostat setup for I-V characterization

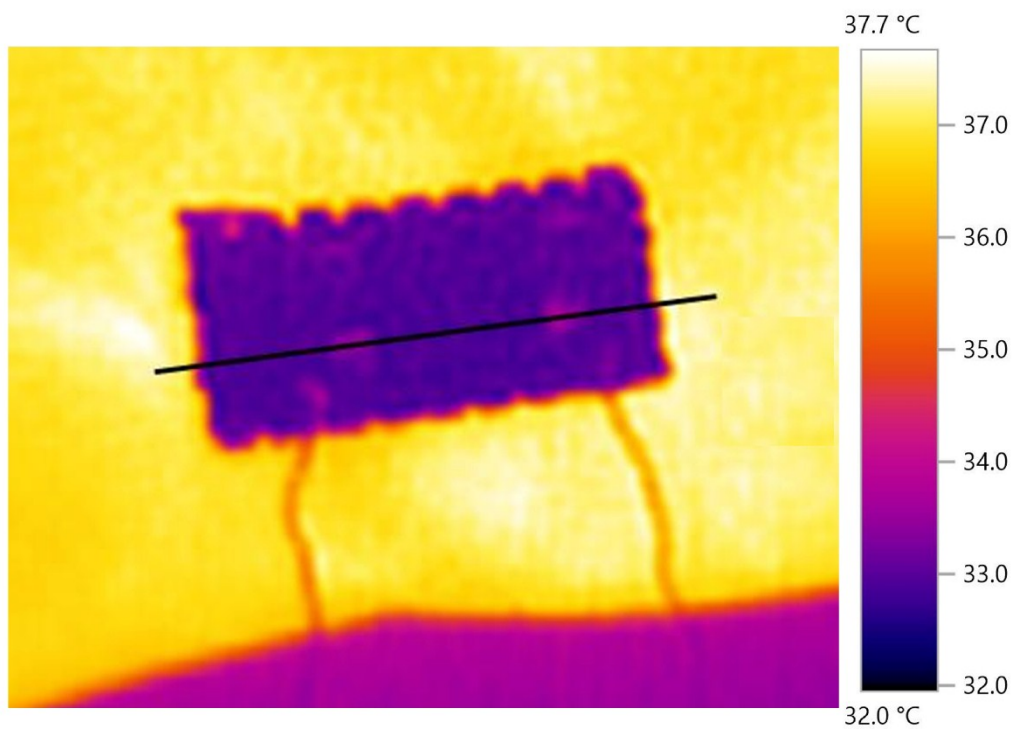

Figure S5: IR imaging of resistor after operating at 200V for 60 sec.

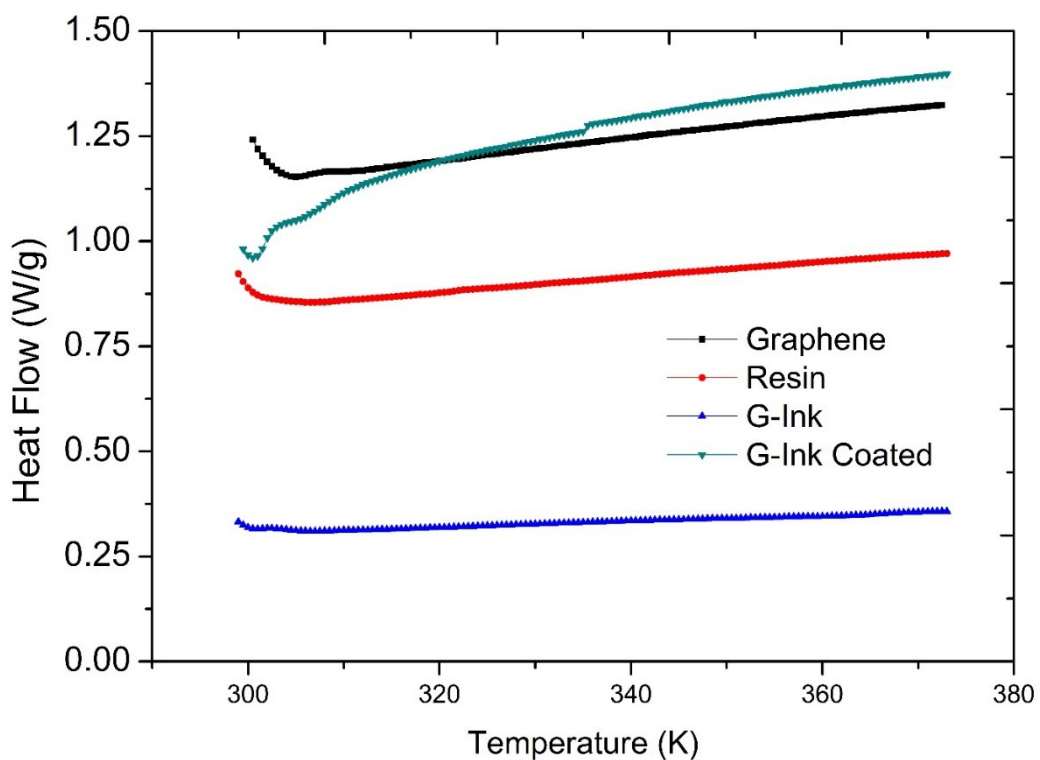

Figure S6: DSC profile of graphene, resin, graphene ink (G-Ink) and graphene ink coated on paper substrate

Table S2: Mean values along with standard deviation of TCR, thermal index and activation energy for variable annealing temperature and time

| Parameters              | Annealed at 373 K for 10 min |             | Annealed at 373 K for 120 min |            | Annealed at 423 K for 10 min |            | Annealed at 423 K for 120 min |            |
|-------------------------|------------------------------|-------------|-------------------------------|------------|------------------------------|------------|-------------------------------|------------|
|                         | Cold Region                  | Hot Region  | Cold Region                   | Hot Region | Cold Region                  | Hot Region | Cold Region                   | Hot Region |
| -ve TCR (PPM/K)         | 750 ± 125                    | 2100 ± 1000 | 850 ± 100                     | 1480 ± 350 | 800 ± 150                    | 2000 ± 400 | 700 ± 150                     | 1100 ± 200 |
| Thermal Index (K)       | 50 ± 10                      | 190 ± 30    | 50 ± 2                        | 125 ± 20   | 50 ± 5                       | 230 ± 40   | 45 ± 6                        | 150 ± 35   |
| Activation Energy (meV) | 8 ± 2                        | 32 ± 5      | 9 ± 0.5                       | 22 ± 4     | 9 ± 1                        | 40 ± 6     | 8 ± 1                         | 25 ± 6     |
| Adj. R-Square           | 0.99                         | 0.94        | 0.99                          | 0.92       | 0.97                         | 0.93       | 0.94                          | 0.86       |

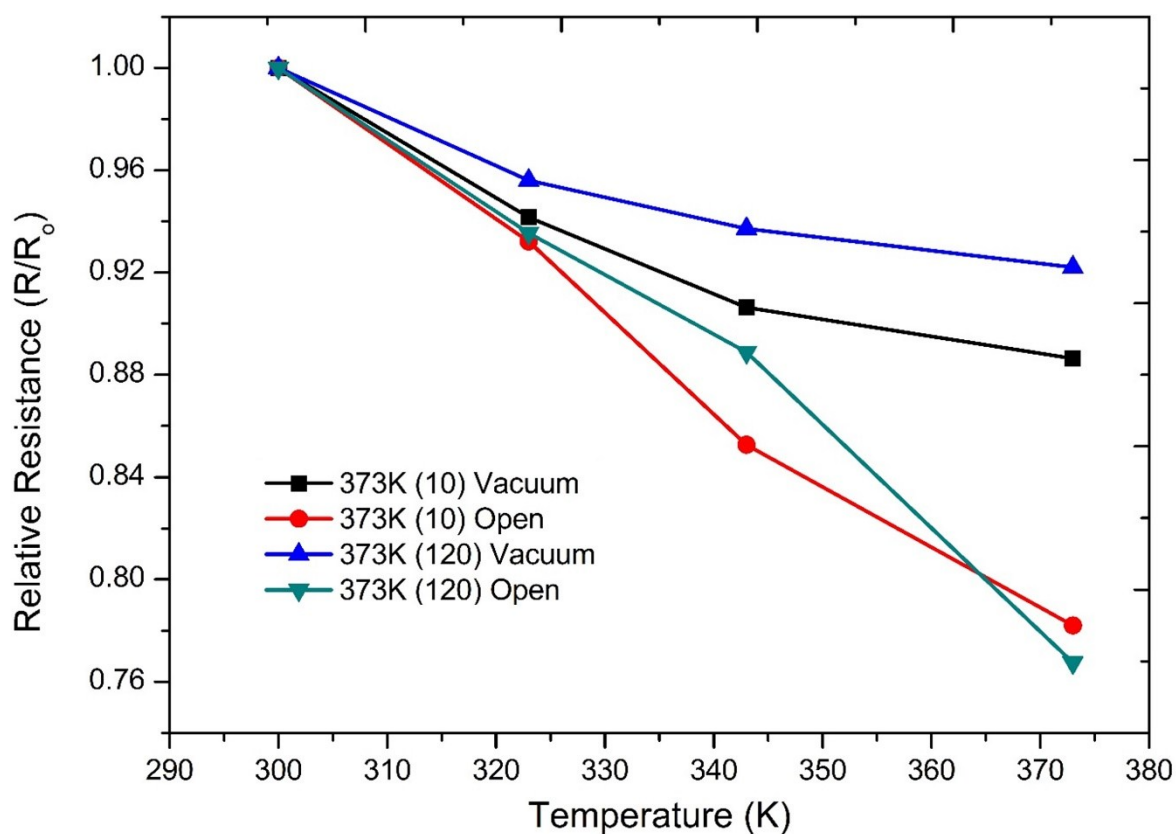

Figure S7: Change in relative resistance with temperature in vacuum and open for sample annealed at 373 K

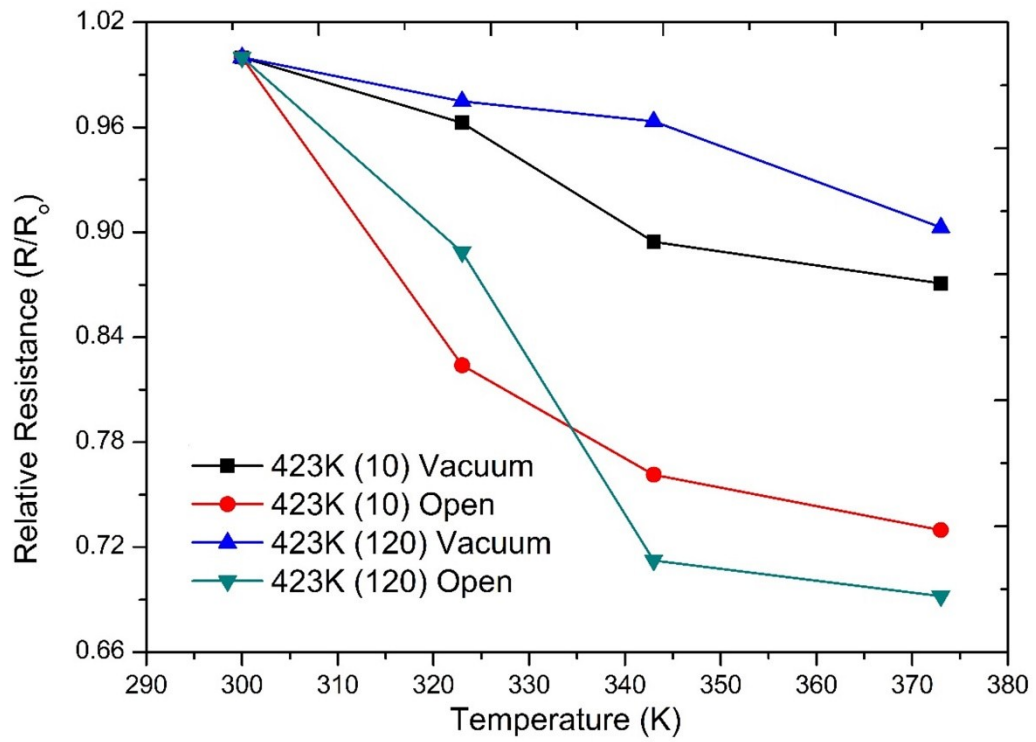

Figure S8: Change in relative resistance with temperature in vacuum and open for sample annealed at 423K
